# Supplementary material for: Synthesis, crystal structure, luminescence and electrochemical properties of a Salamo-type trinuclear cobalt(II) complex
Source: publisher site journal article supplement (doi:10.1515/znb-2017-0191), 2018-03-12
Supplement: Supplementary file 1 [file B17191-suppinfo1a.pdf › Supplement/B17191-suppinfo1a.pdf]

## Supporting Information

**Zong-Li Ren, Jing Hao, Ping Hao, Xiu-Yan Dong, Yang Bai and Wen-Kui Dong\***

**Synthesis, crystal structure, luminescence and electrochemical properties of a salamo-type trinuclear cobalt(II) complex**

DOI: 10.1515/znb-2017-0191

Received October 27, 2017; accepted November 29, 2018

**\* Corresponding author: Wen-Kui Dong**, School of Chemical and Biological Engineering, Lanzhou Jiaotong University, Lanzhou, Gansu 730070, P. R. China, e-mail: dongwk@126.com

**Zong-Li Ren, Jing Hao, Xiu-Yan Dong and Yang Bai:** School of Chemical and Biological Engineering, Lanzhou Jiaotong University, Lanzhou, Gansu 730070, P. R. China

**Fig. S1.** Part of the plane-like supramolecular structure of the Co(II) complex with intermolecular hydrogen bondings (hydrogen atoms, except those forming hydrogen bonds, are omitted for clarity).

**Fig. S2.** Part of the infinite 3D supramolecular structure of the Co(II) complex with intermolecular hydrogen bondings (hydrogen atoms, except those forming hydrogen bonds, are omitted for clarity).

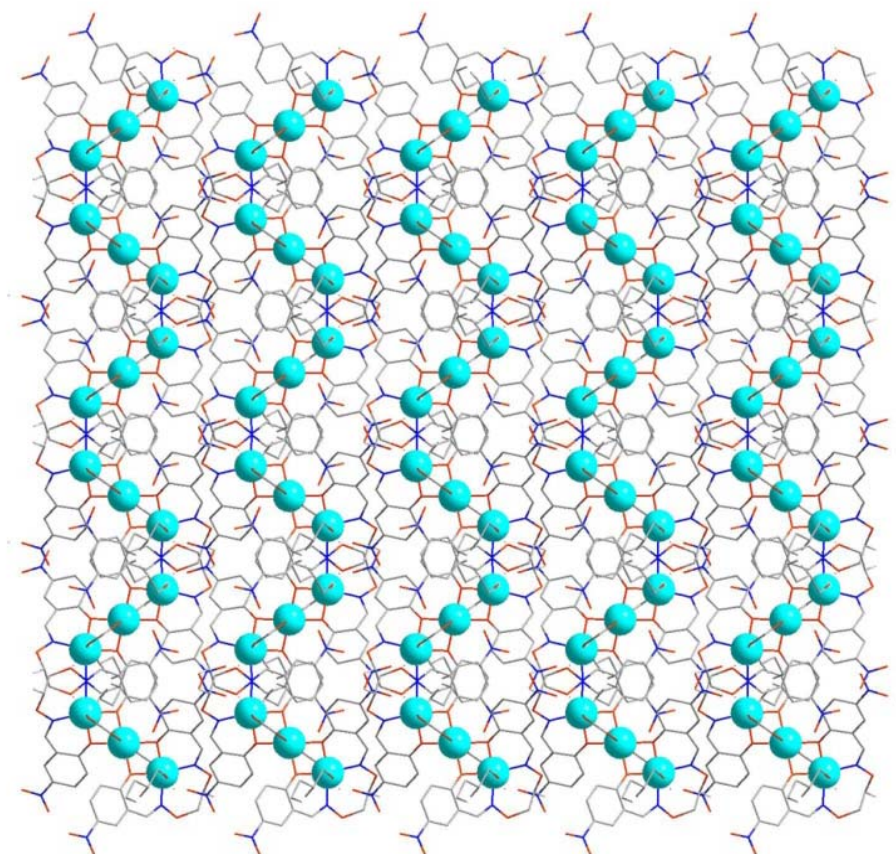

**Fig. S1.** Part of the plane-like supramolecular structure of the Co(II) complex with intermolecular hydrogen bondings (hydrogen atoms, except those forming hydrogen bonds, are omitted for clarity).

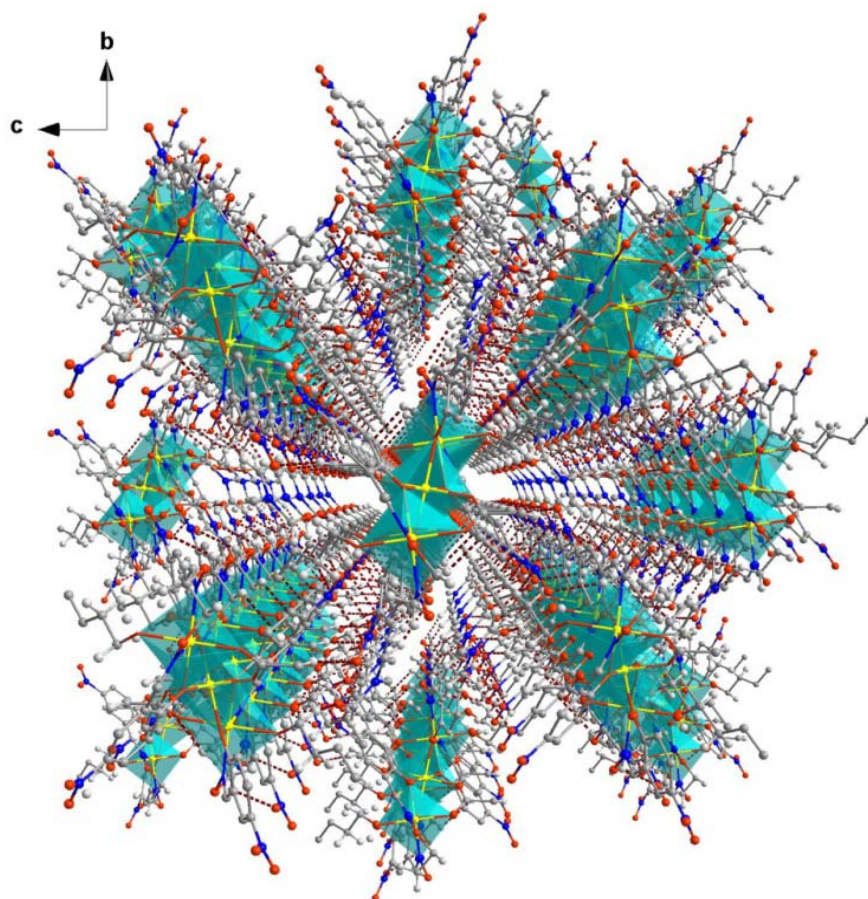

**Fig. S2.** Part of the infinite 3D supramolecular structure of the Co(II) complex with intermolecular hydrogen bondings (hydrogen atoms, except those forming hydrogen bonds, are omitted for clarity).
